# Supplementary material for: Stressors and Resilience within the Cassava Value Chain in Nigeria: Preferred Cassava Variety Traits and Response Strategies of Men and Women to Inform Breeding
Source: MDPI journal article supplement (doi:10.3390/su15107837), 2023-05-10
Supplement: s1 [file s1]

**Table S1. Socioeconomic characteristics of respondents by gender and state**

| Variables                            | Benue     |           | Osun      |           | Imo       |           | Total     |           |
|--------------------------------------|-----------|-----------|-----------|-----------|-----------|-----------|-----------|-----------|
|                                      | M<br>N=33 | F<br>N=30 | M<br>N=35 | F<br>N=27 | M<br>N=24 | F<br>N=38 | M<br>N=92 | F<br>N=95 |
| Age                                  |           |           |           |           |           |           |           |           |
| less or equal 20                     | 0.0       | 3.3       | 0.0       | 0.0       | 0.0       | 2.6       | 0.0       | 2.1       |
| 21-30                                | 16.7      | 46.7      | 8.6       | 7.4       | 0.0       | 17.9      | 9.5       | 24.0      |
| 31-40                                | 27.8      | 13.3      | 42.9      | 37.0      | 25.0      | 25.6      | 32.6      | 25.0      |
| 41-50                                | 30.6      | 26.7      | 25.7      | 22.2      | 33.3      | 23.1      | 29.5      | 24.0      |
| 51-60                                | 19.4      | 6.7       | 11.4      | 22.2      | 33.3      | 10.3      | 20.0      | 12.5      |
| >60                                  | 5.6       | 3.3       | 11.4      | 11.1      | 8.3       | 20.5      | 8.4       | 12.5      |
| Other occupation                     |           |           |           |           |           |           |           |           |
| Farming                              | 5.6       | 23.3      | 5.7       | 0.0       | 8.3       | 7.7       | 6.3       | 10.4      |
| Trading                              | 30.6      | 33.3      | 11.4      | 55.6      | 25.0      | 48.7      | 22.1      | 45.8      |
| Artisan                              | 19.4      | 10.0      | 22.9      | 11.1      | 16.7      | 5.1       | 21.1      | 8.3       |
| Marketing of farm produce            | 13.9      | 26.7      | 8.6       | 40.7      | 8.3       | 12.8      | 10.5      | 25.0      |
| Public Service                       | 5.6       | 0.0       | 14.3      | 7.4       | 0.0       | 2.6       | 7.4       | 3.1       |
| Cassava marketing                    | 2.8       | 20.0      | 2.9       |           |           | 2.6       | 2.1       | 15.6      |
| Religion                             |           |           |           |           |           |           |           |           |
| Christianity                         | 100.0     | 100.0     | 80.0      | 55.6      | 100.0     | 100.0     | 92.6      | 87.5      |
| Islam                                |           |           | 20.0      | 44.4      |           |           | 7.4       | 12.5      |
| Marital status                       |           |           |           |           |           |           |           |           |
| Married in a monogamous setting      | 55.6      | 60.0      | 82.9      | 74.1      | 87.5      | 61.5      | 73.7      | 64.6      |
| married in a polygamous setting      | 41.7      | 33.3      | 17.1      | 25.9      | 0.0       | 5.1       | 22.1      | 17.7      |
| Separated                            | 0.0       | 0.0       | 0.0       | 0.0       | 0.0       | 0.0       | 0.0       | 2.1       |
| single                               | 2.8       | 0.0       | 0.0       | 0.0       | 4.2       | 2.6       | 2.1       | 1.0       |
| widow                                | 0.0       | 6.7       | 0.0       | 0.0       | 8.3       | 30.8      | 2.1       | 14.6      |
| Educational level                    |           |           |           |           |           |           |           |           |
| No formal education                  | 13.9      | 46.7      | 11.4      | 29.6      | 0.0       | 5.1       | 9.5       | 25.0      |
| Primary                              | 30.6      | 16.7      | 8.6       | 37.0      | 41.7      | 38.5      | 25.3      | 31.3      |
| Secondary                            | 36.1      | 33.3      | 42.9      | 18.5      | 50.0      | 48.7      | 42.1      | 35.4      |
| Tertiary                             | 19.4      | 3.3       | 37.1      | 14.8      | 8.3       | 7.7       | 23.2      | 8.3       |
| Indigene                             | 58.3      | 30.0      | 54.1      | 51.9      | 95.8      | 79.5      | 57.9      | 56.3      |
| <b>Land ownership</b>                |           |           |           |           |           |           |           |           |
| Personal                             | 66.7      | 70.0      | 20.0      | 25.9      | 87.5      | 61.5      | 54.7      | 54.2      |
| Family                               | 33.3      | 13.3      | 37.1      | 51.9      | 66.7      | 64.1      | 43.2      | 44.8      |
| Rented                               | 69.4      | 46.7      | 71.4      | 51.9      | 33.3      | 46.2      | 61.1      | 47.9      |
| Leasehold                            | 11.1      | 3.3       | 22.9      | 3.7       | 12.5      | 15.4      | 15.8      | 8.3       |
| <b>Member of cooperative</b>         | 38.9      | 26.7      | 31.4      | 22.2      | 12.5      | 20.5      | 29.5      |           |
| Household size                       |           |           |           |           |           |           |           |           |
| less or equal 4                      | 19.4      | 33.3      | 37.1      | 44.4      | 25.0      | 46.2      | 27.4      | 41.7      |
| 5-8                                  | 38.9      | 56.7      | 42.9      | 55.6      | 58.3      | 41.0      | 45.3      | 50.0      |
| 9-12                                 | 16.7      | 6.7       | 14.3      |           | 12.5      | 12.8      | 14.7      | 7.3       |
| >12                                  | 25.0      | 3.3       | 5.7       |           | 4.2       | 0.0       | 12.6      | 1.0       |
| Years of experience running own farm |           |           |           |           |           |           |           |           |
| less or equal 10                     | 19.4      | 63.3      | 22.9      | 51.9      | 41.7      | 25.6      | 26.3      | 44.8      |
| 11-20                                | 41.7      | 16.7      | 42.9      | 25.9      | 4.2       | 30.8      | 32.6      | 25.0      |
| 21-30                                | 19.4      | 13.3      | 25.7      | 14.8      | 29.2      | 17.9      | 24.2      | 15.6      |
| 31-40                                | 11.1      | 6.7       | 8.6       | 7.4       | 12.5      | 10.3      | 10.5      | 8.3       |
| 41-50                                | 8.3       | 0.0       | 0.0       | 0.0       | 12.5      | 10.3      | 6.3       | 4.2       |
| >50                                  | 0.0       | 0.0       | 0.0       | 0.0       | 0.0       | 5.1       | 0.0       | 2.1       |

|                                       |      |      |       |      |       |      |      |      |
|---------------------------------------|------|------|-------|------|-------|------|------|------|
| Farm size (Ha)                        |      |      |       |      |       |      |      |      |
| less or equal 2                       | 38.9 | 63.3 | 28.6  | 66.7 | 83.3  | 89.7 | 46.3 | 75.0 |
| 3-4                                   | 19.4 | 23.3 | 22.9  | 29.6 | 16.7  | 5.1  | 20.0 | 17.7 |
| 5-6                                   | 25.0 | 6.7  | 20.0  | 3.7  | 0.0   | 5.1  | 16.8 | 5.2  |
| >6                                    | 16.7 | 6.7  | 28.6  | 0.0  | 0.0   | 0.0  | 16.8 | 2.1  |
| Cassava Farm size                     |      |      |       |      |       |      |      |      |
| less or equal 2                       | 72.2 | 96.7 | 62.9  | 77.8 | 91.7  | 97.4 | 73.7 | 91.7 |
| 3-4                                   | 19.4 | 3.3  | 25.7  | 18.5 | 8.3   | 2.6  | 18.9 | 6.3  |
| 5-6                                   | 8.3  |      | 2.9   | 0.0  | 0.0   | 0.0  | 4.2  | 1.0  |
| >6                                    | 0.0  |      | 8.6   | 3.7  | 0.0   | 0.0  | 3.2  | 1.0  |
| Proportion by cassava farm (%)        |      |      |       |      |       |      |      |      |
| less or equal 20                      | 22.2 | 20.0 | 11.4  | 7.4  | 8.3   | 10.3 | 14.7 | 12.5 |
| 21-40                                 | 33.3 | 40.0 | 34.3  | 7.4  | 0.0   | 17.9 | 25.3 | 21.9 |
| 41-60                                 | 27.8 | 26.7 | 31.4  | 33.3 | 16.7  | 10.3 | 26.3 | 21.9 |
| 61-80                                 | 0.0  | 6.7  | 17.1  | 22.2 | 37.5  | 20.5 | 15.8 | 16.7 |
| >80                                   | 16.7 | 6.7  | 0.0   | 29.6 | 37.5  | 41.0 | 17.9 | 27.1 |
| Estimated farm income per year        |      |      |       |      |       |      |      |      |
| less or equal 250000                  | 8.3  | 33.3 | 11.4  | 37.0 | 41.7  | 46.2 | 17.9 | 39.6 |
| 251000-500000                         | 19.4 | 33.3 | 20.0  | 37.0 | 20.8  | 33.3 | 20.0 | 34.4 |
| 501000-750000                         | 13.9 | 10.0 | 17.1  | 18.5 | 16.7  | 7.7  | 15.8 | 11.5 |
| 751000-1000000                        | 16.7 | 16.7 | 20.0  | 3.7  | 4.2   | 2.6  | 14.7 | 7.3  |
| >1000000                              | 41.7 | 6.7  | 31.4  | 3.7  | 16.7  | 10.3 | 31.6 | 7.3  |
| Estimated income from cassava/year    |      |      |       |      |       |      |      |      |
| less or equal 250000                  | 50.0 | 83.3 | 45.7  | 74.1 | 62.5  | 71.8 | 51.6 | 76.0 |
| 251000-500000                         | 27.8 | 13.3 | 22.9  | 22.2 | 16.7  | 15.4 | 23.2 | 16.7 |
| 501000-750000                         | 8.3  | 0.0  | 14.3  | 0.0  | 8.3   | 2.6  | 10.5 | 1.0  |
| >750000                               | 13.9 | 3.3  | 17.1  | 3.7  | 12.5  | 10.3 | 14.7 | 6.3  |
| Non-farm income per year              |      |      |       |      |       |      |      |      |
| less or equal 200,000                 | 19.4 | 40.0 | 31.4  | 92.6 | 29.2  | 38.5 | 41.0 | 54.2 |
| 201,000-400,000                       | 16.7 | 6.7  | 11.4  | 0.0  | 12.5  | 17.9 | 21.3 | 9.4  |
| 401000-601000k                        | 11.1 | 6.7  | 2.9   | 0.0  | 8.3   | 2.6  | 11.5 | 2.1  |
| 601000-800000                         | 11.1 | 53.3 | 2.9   | 0.0  | 4.2   | 2.6  | 9.8  | 1.0  |
| >800000                               | 8.3  | 0.0  | 5.7   | 0.0  | 20.8  |      | 16.4 | 1.0  |
| Household monthly expenditure on food |      |      |       |      |       |      |      |      |
| less or equal 20000                   | 2.8  | 36.7 | 22.9  | 25.9 | 12.5  | 30.8 | 12.6 | 31.3 |
| 21,000-40,000                         | 47.2 | 53.3 | 31.4  | 70.4 | 29.2  | 33.3 | 36.8 | 50.0 |
| 41,000-60,000                         | 30.6 | 6.7  | 31.4  | 3.7  | 50.0  | 30.8 | 35.8 | 15.6 |
| 61,000-80,000                         | 8.3  | 3.3  | 5.7   | 0.0  | 4.2   | 2.6  | 6.3  | 2.1  |
| >80,000                               | 11.1 | 0.0  | 8.6   | 0.0  | 4.2   | 2.6  | 8.4  | 1.0  |
| Remittances (monthly)                 |      |      |       |      |       |      |      |      |
| less or equal 20000                   | 25.0 | 23.3 | 14.3  | 14.8 | 25.0  | 51.3 | 21.1 | 32.3 |
| 21,000-40,000                         | 2.8  | 6.7  | 2.9   | 0.0  | 8.3   | 2.6  | 3.2  | 3.1  |
| 41,000-60,000                         | 5.6  | 6.7  | 2.9   | 0.0  | 4.2   | 5.1  | 1.1  | 4.2  |
| >60,000                               | 0.0  | 0.0  | 0.0   | 0.0  | 0.0   | 5.1  | 4.2  | 2.1  |
| Ownership of mobile phone             | 97.2 | 83.3 | 100.0 | 96.3 | 100.0 | 79.5 | 98.9 | 85.4 |
| Control over mobile phone             | 97.2 | 83.3 | 100.0 | 96.2 | 100.0 | 79.5 | 98.9 | 85.4 |
| Ownership of means of transportation  | 77.8 | 26.7 | 71.4  | 33.3 | 62.5  | 20.5 | 71.6 | 26.0 |
| Control over means of transportation  | 80.6 | 23.3 | 68.6  | 22.2 | 62.5  | 10.3 | 71.6 | 17.7 |
| Access to credit facilities           | 50.0 | 33.3 | 54.3  | 55.6 | 25.0  | 35.9 | 45.3 | 40.6 |
| Access to climate information         | 27.8 | 23.3 | 48.6  | 40.7 | 29.2  | 30.8 | 35.8 | 31.3 |

|                                        |      |      |      |      |      |      |      |      |
|----------------------------------------|------|------|------|------|------|------|------|------|
| Benefits from any government programme | 16.7 | 13.3 | 31.4 | 3.7  | 37.5 | 20.5 | 7.4  | 13.5 |
| Access to equipment/infrastructure     | 33.3 | 6.7  | 57.1 | 25.9 | 29.2 | 30.8 | 41.1 | 21.9 |

**Table S2.** Cassava traits and response (coping and adaptation) strategies sources (literatures, expert review and validation and main survey)

| S/N | Cassava Traits                             | Sources: Literatures (2010-2023), Expert reviews/validation, Pre-test and main survey (individual interviews, key informant interviews and focus group discussion)                                  |
|-----|--------------------------------------------|-----------------------------------------------------------------------------------------------------------------------------------------------------------------------------------------------------|
| A   | Complements other staples                  | Acheampong, et al (2013), Expert reviews, individual interview/main- survey, Focus group discussion                                                                                                 |
|     | Leaves inedible to cattle scent/ odour     | Individual interview pretest, Focus group discussion                                                                                                                                                |
|     | Thrives in any soil                        | Bentley et al, 2017, Focus group discussion                                                                                                                                                         |
|     | Thrives with intercropping                 | Madu et al., 2022, Bentley et al, 2017, Expert review and Focus group discussion                                                                                                                    |
|     | Contributes to food during drought         | Acheampong, et al (2013), focus group discussion                                                                                                                                                    |
|     | Provides diverse food during lean season   | Teeken, et al (2018), Expert reviews, focus group discussion                                                                                                                                        |
|     | Long duration/late maturity                | Bentley et al., 2017, Tufan et al., 2018, Teeken et al., 2018, 2021. Focus group discussion                                                                                                         |
|     | Short duration/early maturity              | Bentley et al., 2017, Tufan et al., 2018, Teeken et al., 2018, 2021, Adjebeng-Danquah et al (2020), Ndjouenkeu et al., 2020                                                                         |
|     | Tolerance to pest and diseases             | Balogun et al., 2021, Adjebeng-Danquah et al (2020), Bentley et al, 2017, Acheampong, et al (2013),                                                                                                 |
|     | Survive in a water logged area             | Bentley et al, 2017, Teeken, et al (2018), Expert reviews                                                                                                                                           |
|     | In-ground storability                      | Bentley et al., 2017, Tufan et al., 2018, Teeken et al., 2018, 2021, Ndjouenkeu et al., 2020, Expert reviews.                                                                                       |
|     | Thrives on low nutrient soil               | Bentley et al, 2017, Teeken, et al (2018), Acheampong, et al (2013), Expert reviews                                                                                                                 |
|     | Tolerance to dry spells                    | Bentley et al, 2017, Teeken, et al (2018), Expert reviews                                                                                                                                           |
|     | Short duration/early bulking               | Bentley et al., 2017, Tufan et al., 2018, Teeken et al., 2018, 2021 Expert reviews, Focus group discussion                                                                                          |
|     | High root yield                            | Bentley et al., 2017, Tufan et al., 2018, Teeken et al., 2018, 2021, Ndjouenkeu et al., 2020, Pushpalatha & Gangadharan, 2021, Expert reviews, individual interview pretest, Focus group discussion |
|     | Minimal inputs and management requirements | Bentley et al., 2017, Individual interview pretest, Focus group discussion                                                                                                                          |
|     | Low cost of production                     | Acheampong, et al (2013), Expert reviews, Focus group discussion                                                                                                                                    |
|     | High stem yield                            | Bentley et al., 2017, Expert reviews, Individual interview pretest, Focus group discussion                                                                                                          |
|     | Flexible harvesting times                  | Bentley et al., 2017, Tufan et al., 2018, Teeken et al., 2018, 2021, Expert reviews, Focus group discussion, Key Informant Interviews                                                               |

|    |                                                                                                                                        |                                                                                                                                                                                                                                       |
|----|----------------------------------------------------------------------------------------------------------------------------------------|---------------------------------------------------------------------------------------------------------------------------------------------------------------------------------------------------------------------------------------|
|    | Root Milking                                                                                                                           | Bentley et al., 2017, Individual and key informant pre-test, focus group discussion                                                                                                                                                   |
| B1 | <b>Conflict related coping strategies (herder-farmer clashes, communal crises, land-use conflicts)</b>                                 |                                                                                                                                                                                                                                       |
|    | Early planting                                                                                                                         | Adjebeng-Danquah et al (2020), focus group discussion                                                                                                                                                                                 |
|    | Early harvesting                                                                                                                       | Key Informant Interviews, Focus group discussion.                                                                                                                                                                                     |
|    | Backyard/neighborhood farming                                                                                                          | Key Informant Interviews, Focus group discussion.                                                                                                                                                                                     |
|    | Relocating farms                                                                                                                       | Yikwa and Oludayo, 2021. Expert reviews, Focus group discussion, Key Informant Interviews,                                                                                                                                            |
|    | Managing multiple plots                                                                                                                | Expert reviews, Focus group discussion, Key Informant Interviews                                                                                                                                                                      |
|    | Migrating                                                                                                                              | Haider, 2019, Lenshie et al., 2020. Expert reviews, Focus group discussion, individual and Key Informant Interviews                                                                                                                   |
|    | Intercropping                                                                                                                          | Expert reviews, Focus group discussion, Key Informant Interviews                                                                                                                                                                      |
|    | Crop diversification                                                                                                                   | Sangotegbe, et al (2010), Rudolf and Hermann (2009); Apata et al (2009), Sangotegbe, et al. (2015), Hansa et al., (2017)<br>Expert reviews, Focus group discussion, Key Informant Interviews                                          |
|    | Engage in non-agricultural livelihood                                                                                                  | Sangotegbe, et al. (2015), Focus group discussion, Key Informant Interviews                                                                                                                                                           |
|    | Praying                                                                                                                                | Individual interview pre-test, Focus group discussion, Key Informant Interviews                                                                                                                                                       |
|    | Loan                                                                                                                                   | Focus group discussion, Key Informant Interviews                                                                                                                                                                                      |
|    | Frequent farm visits/close monitoring                                                                                                  | Sangotegbe, et al. (2015) Focus group discussion, Key Informant Interviews, FAO, (2015): <a href="http://www.fao.org/3/i5188e/i5188E.pdf">www.fao.org/3/i5188e/i5188E.pdf</a>                                                         |
|    | Vigilante/security agents                                                                                                              | Individual interview pre-test, Focus group discussion, Key Informant Interviews                                                                                                                                                       |
| B2 | <b>Environmental/Climate related coping strategies (Pests and Diseases, drought, high temperature, nutrient depletion and erosion)</b> |                                                                                                                                                                                                                                       |
|    | Growing disease resistant crops                                                                                                        | Ikeogu et al, 2022; Elsie et al.,2018, Expert reviews                                                                                                                                                                                 |
|    | Growing underground RTCs                                                                                                               | Ikeogu et al, 2022, Expert reviews                                                                                                                                                                                                    |
|    | Relatively low farm size                                                                                                               | Expert reviews, Focus group discussion, Key Informant Interviews                                                                                                                                                                      |
|    | Selective crop cultivation                                                                                                             | Fawole & Aderinoye-Abdulwahab, 2019, Focus group discussion                                                                                                                                                                           |
|    | Sowing less                                                                                                                            | Expert reviews, Focus group discussion, Key Informant Interviews                                                                                                                                                                      |
|    | Migrating                                                                                                                              | FAO. 2017. The future of food and agriculture – Trends and challenges. Rome, <a href="http://www.fao.org/3/i6583e/i6583e.pdf">www.fao.org/3/i6583e/i6583e.pdf</a><br>Expert reviews, Focus group discussion, Key Informant Interviews |
|    | Grow crops in upland case of flash floods                                                                                              | Expert reviews, Focus group discussion, Key Informant Interviews                                                                                                                                                                      |
|    | Use of chemicals (fertilizer/manure/herbicides application)                                                                            | Expert reviews, Focus group discussion, Key Informant Interviews, Brenda, (2011), <a href="https://doi.org/10.1525/bio.2011.61.3.4">https://doi.org/10.1525/bio.2011.61.3.4</a>                                                       |
